# Supplementary material
Source: PubMed Central journal article supplement (PMC8562326)
Supplement: ntab057_suppl_Supplementary_Figure_S1.pdf [file ntab057_suppl_Supplementary_Figure_S1.pdf]

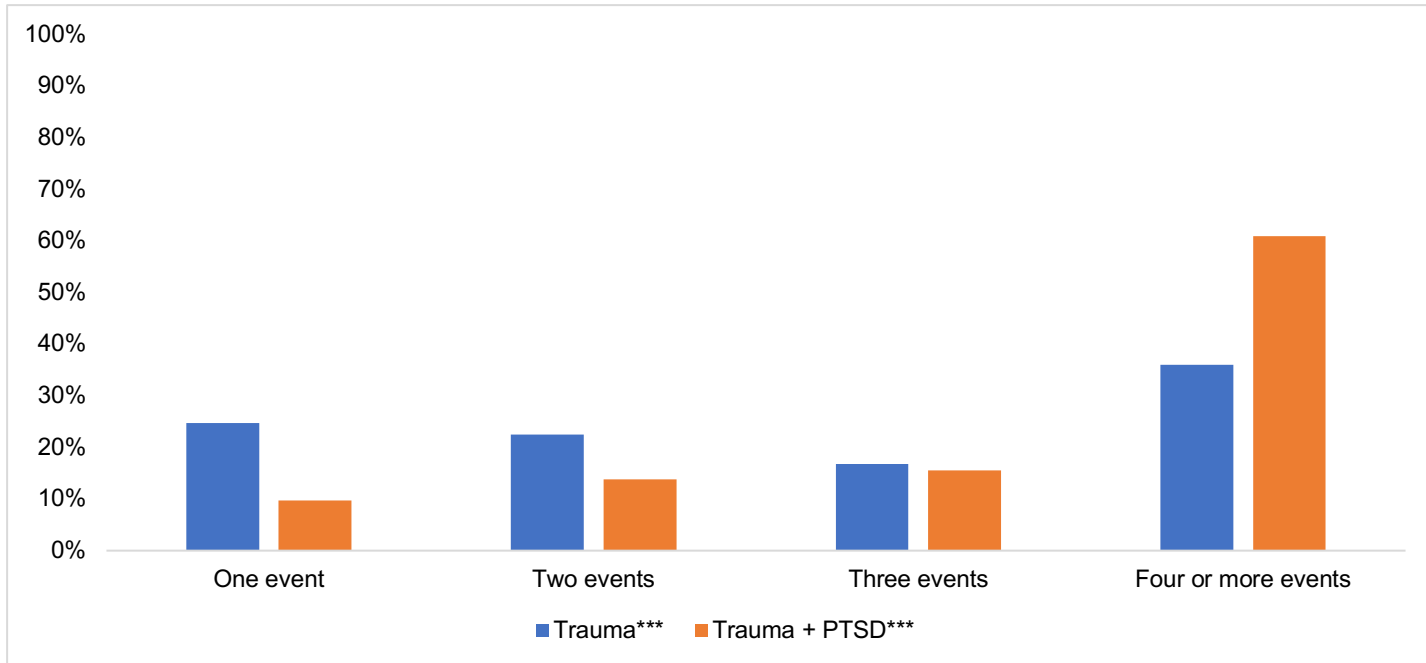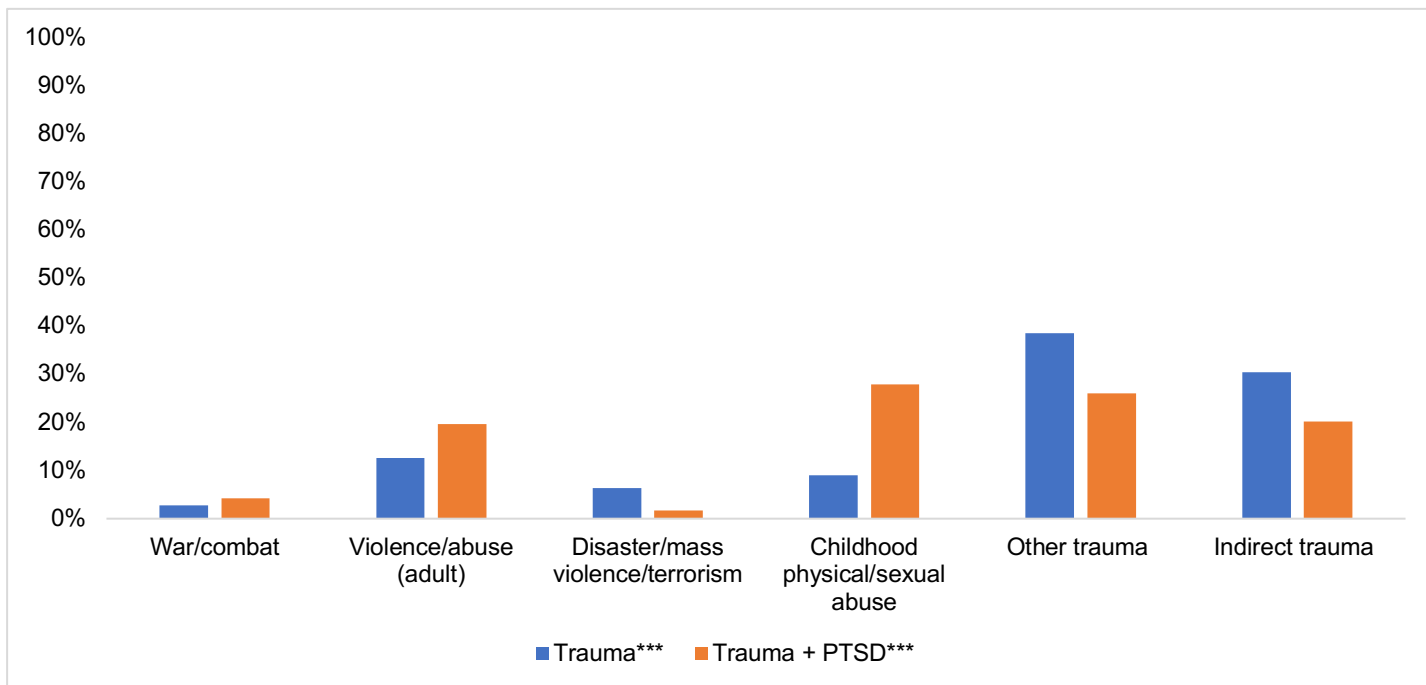

\*\*\*p<0.001- chi square analysis of differences by trauma exposure group

**Supplementary Figure 1. Trauma exposure characteristics: Number of traumatic event types experienced (top); trauma exposure types experienced (bottom)**
