# Supplementary material
Source: PubMed Central journal article supplement (PMC8562326)
Supplement: ntab057_suppl_Supplementary_Figure_S2.pdf [file ntab057_suppl_Supplementary_Figure_S2.pdf]

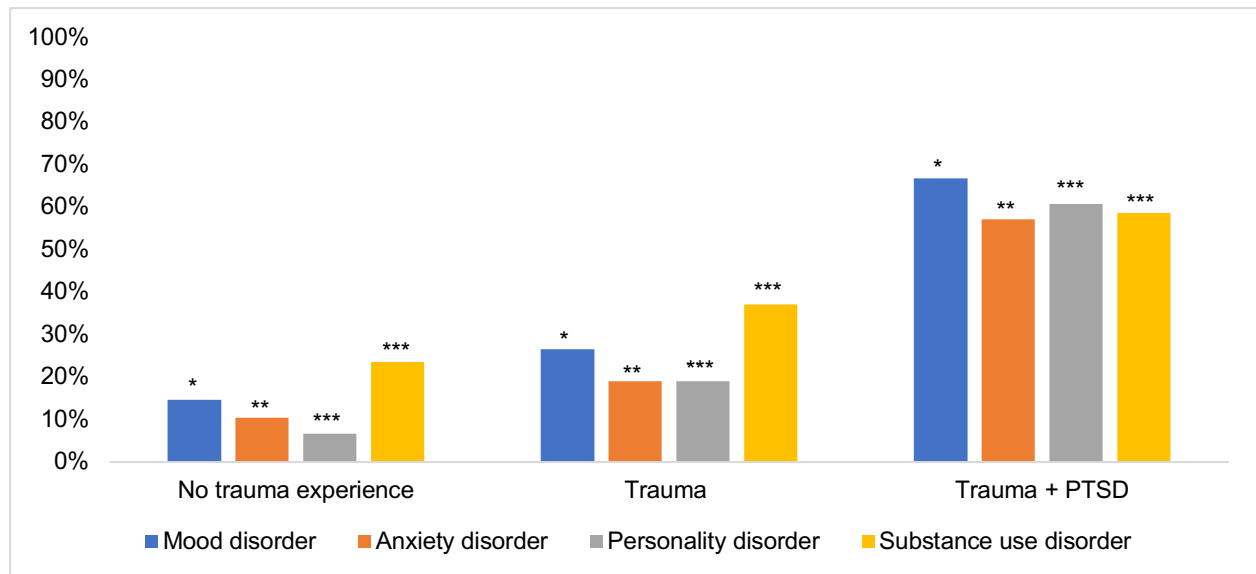

Weighted chi square \* $p < 0.05$ , \*\* $p < 0.01$ , \*\*\* $p < 0.001$

Note: Each BH condition analyzed separately; p-values represent differences between trauma exposure groups

**Supplementary Figure 2. BH comorbidities by trauma exposure status**
