# Supplementary material
Source: PubMed Central journal article supplement (PMC8562326)
Supplement: ntab057_suppl_Supplementary_Table_S1.pdf [file ntab057_suppl_Supplementary_Table_S1.pdf]

**Supplementary Table 1. Sociodemographic characteristics of total sample (N=36,151)**

|                                        | N     | Weighted % |
|----------------------------------------|-------|------------|
| <b>Age</b>                             |       |            |
| <30                                    | 8089  | 21.7       |
| 30-39                                  | 6871  | 16.7       |
| 40-49                                  | 6512  | 18.1       |
| 50-59                                  | 6345  | 18.3       |
| 60+                                    | 8334  | 25.2       |
| <b>Sex</b>                             |       |            |
| Male                                   | 15797 | 48.1       |
| Female                                 | 20354 | 51.9       |
| <b>Race/ethnicity</b>                  |       |            |
| White                                  | 19108 | 66.2       |
| Black/African American                 | 7731  | 11.8       |
| American Indian/Alaska Native          | 510   | 1.6        |
| Asian/Native Hawaiian/Pacific Islander | 1797  | 5.8        |
| Hispanic/Latino                        | 7005  | 14.7       |
| <b>Marital status</b>                  |       |            |
| Married/living with someone            | 16727 | 57.9       |
| Widowed/divorced/separated             | 9381  | 19.7       |
| Never Married                          | 10043 | 22.5       |
| <b>Family income</b>                   |       |            |
| <\$20,000                              | 10579 | 22.8       |
| \$20000-\$39999                        | 7819  | 18.9       |
| \$40000-\$79999                        | 11137 | 32.5       |
| >\$80000                               | 6616  | 25.8       |
| <b>Sexual orientation</b>              |       |            |
| Heterosexual                           | 34494 | 95.9       |
| Gay/lesbian                            | 583   | 1.5        |
| Bisexual                               | 563   | 1.3        |
| Not sure/missing                       | 511   | 1.3        |
