# Supplementary material
Source: PubMed Central journal article supplement (PMC8562326)
Supplement: ntab057_suppl_Supplementary_Table_S2.pdf [file ntab057_suppl_Supplementary_Table_S2.pdf]

| <b>Recoded trauma type category</b>           | <b>Corresponding NESARC-III flashcard response choice</b>                                                   |                                                           |                                      |                        |                            |                                                                         |
|-----------------------------------------------|-------------------------------------------------------------------------------------------------------------|-----------------------------------------------------------|--------------------------------------|------------------------|----------------------------|-------------------------------------------------------------------------|
| War/combat <sup>1</sup>                       | Active military combat                                                                                      | Peacekeeper/relief worker                                 | Civilian in war zone/place of terror | Prisoner of war        |                            |                                                                         |
| Violence/abuse (adulthood) <sup>1</sup>       | Sexually assaulted as an adult                                                                              | Beaten up by spouse/romantic partner                      | Beaten up by someone else            | Kidnapped/held hostage | Stalked                    | Mugged, held up, threatened with a weapon or assaulted in any other way |
| Disaster/mass violence/terrorism <sup>1</sup> | Injured in a terrorist attack                                                                               | Natural disaster, like flood, fire, earthquake, hurricane |                                      |                        |                            |                                                                         |
| Childhood physical/sexual abuse <sup>1</sup>  | Sexually abused before age 18                                                                               | Physically abused before age 18                           |                                      |                        |                            |                                                                         |
| Other trauma                                  | Serious or life-threatening injury                                                                          | Serious or life-threatening illness                       | Saw a dead body or body parts        | Refugee                | Juvenile detention or jail | Any other traumatic or stressful event that happened to you             |
|                                               | Unknown                                                                                                     |                                                           |                                      |                        |                            |                                                                         |
| Indirect trauma <sup>3</sup>                  | Personally witnessed any of the above traumatic events happening to a friend, relative, or any other person |                                                           |                                      |                        |                            |                                                                         |

<sup>1</sup>Categories defined by U.S. Department of Veterans Affairs National Center for PTSD

<sup>2</sup>Categories defined by authors

<sup>3</sup>Variable included in NESARC-III dataset
